# Supplementary material
Source: Research Square preprint supplement (doi:10.21203/rs.3.rs-10106384/v1)
Supplement: Supplementary file 1 [file 9898da89f59dc439987616d8.docx]

**Appendix A**

Table A1. Mean values of nine hydrological signature metrics across five sub-basins for six calibration methods. Bold values indicate the best-performing method in each (station, metric) cell.

| **Station** | **Method** | **KGE** | **RMSE** | **PBIAS (%)** | **Peak Ratio** | **Low Flow Ratio** | **BFI Bias (%)** | **Peak Timing Bias (d)** | **Peak Mag. Bias (%)** | **Recession K Ratio** |
| --- | --- | --- | --- | --- | --- | --- | --- | --- | --- | --- |
| XX | SADR (G) | 0.653 | 165.8 | -3.1 | 0.812 | 1.41 | **0.5** | -0.20 | **18.8** | 2.01 |
| MADR (G) | 0.817 | 127.2 | 4.3 | 0.908 | 1.52 | 4.8 | -0.07 | 23.4 | 1.50 |
| SADR (C) | 0.817 | 131.6 | 6.1 | 0.942 | 1.42 | -3.5 | -0.12 | 31.0 | 2.10 |
| MADR (C) | 0.843 | 125.7 | **-0.5** | **0.960** | 1.12 | -8.5 | -0.09 | 32.0 | 2.30 |
| NSGA-III | 0.853 | 117.8 | -4.8 | 0.933 | **1.03** | -1.6 | -0.07 | 24.6 | 1.48 |
| SCE-UA | **0.860** | **116.7** | -7.4 | 0.941 | 0.79 | -2.7 | **0.05** | 24.7 | **1.37** |
| WJB | SADR (G) | **0.878** | **156.3** | **1.0** | 0.957 | **1.70** | 3.1 | 0.03 | 3.7 | 1.14 |
| MADR (G) | 0.847 | 170.0 | 6.6 | 0.977 | 2.18 | 7.3 | 0.10 | 5.7 | 0.87 |
| SADR (C) | 0.852 | 168.8 | 5.7 | **1.016** | 1.89 | **1.8** | 0.05 | 10.5 | **1.08** |
| MADR (C) | 0.864 | 165.5 | 4.4 | 0.972 | 2.00 | 6.4 | 0.14 | 5.5 | 0.88 |
| NSGA-III | 0.857 | 165.5 | 1.8 | 0.874 | 2.17 | 17.6 | -0.02 | -5.0 | 0.44 |
| SCE-UA | 0.852 | 162.7 | 5.7 | 0.889 | 2.18 | 19.5 | **0.00** | **-3.4** | 0.37 |
| JJJ | SADR (G) | 0.376 | 118.9 | -31.7 | 0.507 | **1.47** | **0.7** | -0.12 | -29.5 | 1.25 |
| MADR (G) | 0.526 | 106.3 | -19.8 | 0.662 | 2.17 | -4.7 | -0.07 | -8.6 | 1.19 |
| SADR (C) | 0.402 | 116.7 | -30.3 | 0.533 | 1.52 | -1.4 | -0.10 | -26.5 | 1.32 |
| MADR (C) | **0.533** | 106.7 | **-18.1** | 0.667 | 2.17 | -5.1 | **-0.04** | -7.7 | 1.20 |
| NSGA-III | 0.533 | **104.8** | -22.4 | **0.688** | 1.85 | -6.3 | 0.13 | **-4.5** | **0.92** |
| SCE-UA | 0.520 | 106.5 | -23.9 | 0.670 | 1.58 | -14.1 | 0.11 | -6.6 | 1.26 |
| ZK | SADR (G) | 0.728 | 127.2 | 8.7 | 0.866 | 12.70 | 20.6 | **-0.18** | 21.3 | 0.62 |
| MADR (G) | 0.688 | 127.3 | 13.5 | 0.834 | 15.08 | 24.5 | -0.21 | 18.5 | 0.55 |
| SADR (C) | 0.714 | 127.7 | 11.7 | 0.865 | 13.44 | 22.5 | -0.19 | 22.0 | 0.59 |
| MADR (C) | 0.777 | 112.5 | **3.7** | 0.834 | **11.57** | 22.0 | -0.28 | **13.1** | **0.63** |
| NSGA-III | **0.841** | 112.6 | 9.2 | **0.939** | 17.20 | **17.8** | -0.24 | 22.8 | 0.34 |
| SCE-UA | 0.758 | **110.8** | 19.5 | 0.926 | 20.72 | 25.9 | -0.24 | 22.1 | 0.29 |
| BB | SADR (G) | 0.569 | 618.0 | 42.2 | 1.192 | 4.93 | 13.5 | -0.68 | 25.4 | 0.40 |
| MADR (G) | 0.608 | 591.9 | 36.9 | **1.121** | 4.69 | 12.7 | -0.32 | **19.6** | **0.41** |
| SADR (C) | 0.579 | 618.2 | 41.0 | 1.177 | 4.81 | 13.5 | -0.24 | 24.5 | 0.40 |
| MADR (C) | 0.616 | 591.9 | 37.4 | 1.181 | **4.44** | **12.2** | 0.08 | 26.5 | 0.41 |
| NSGA-III | **0.627** | **559.3** | **36.4** | 1.184 | 4.90 | 14.4 | 0.05 | 24.7 | 0.26 |
| SCE-UA | 0.516 | 618.7 | 48.0 | 1.184 | 5.14 | 13.6 | **0.03** | 25.6 | 0.32 |

**Appendix B**


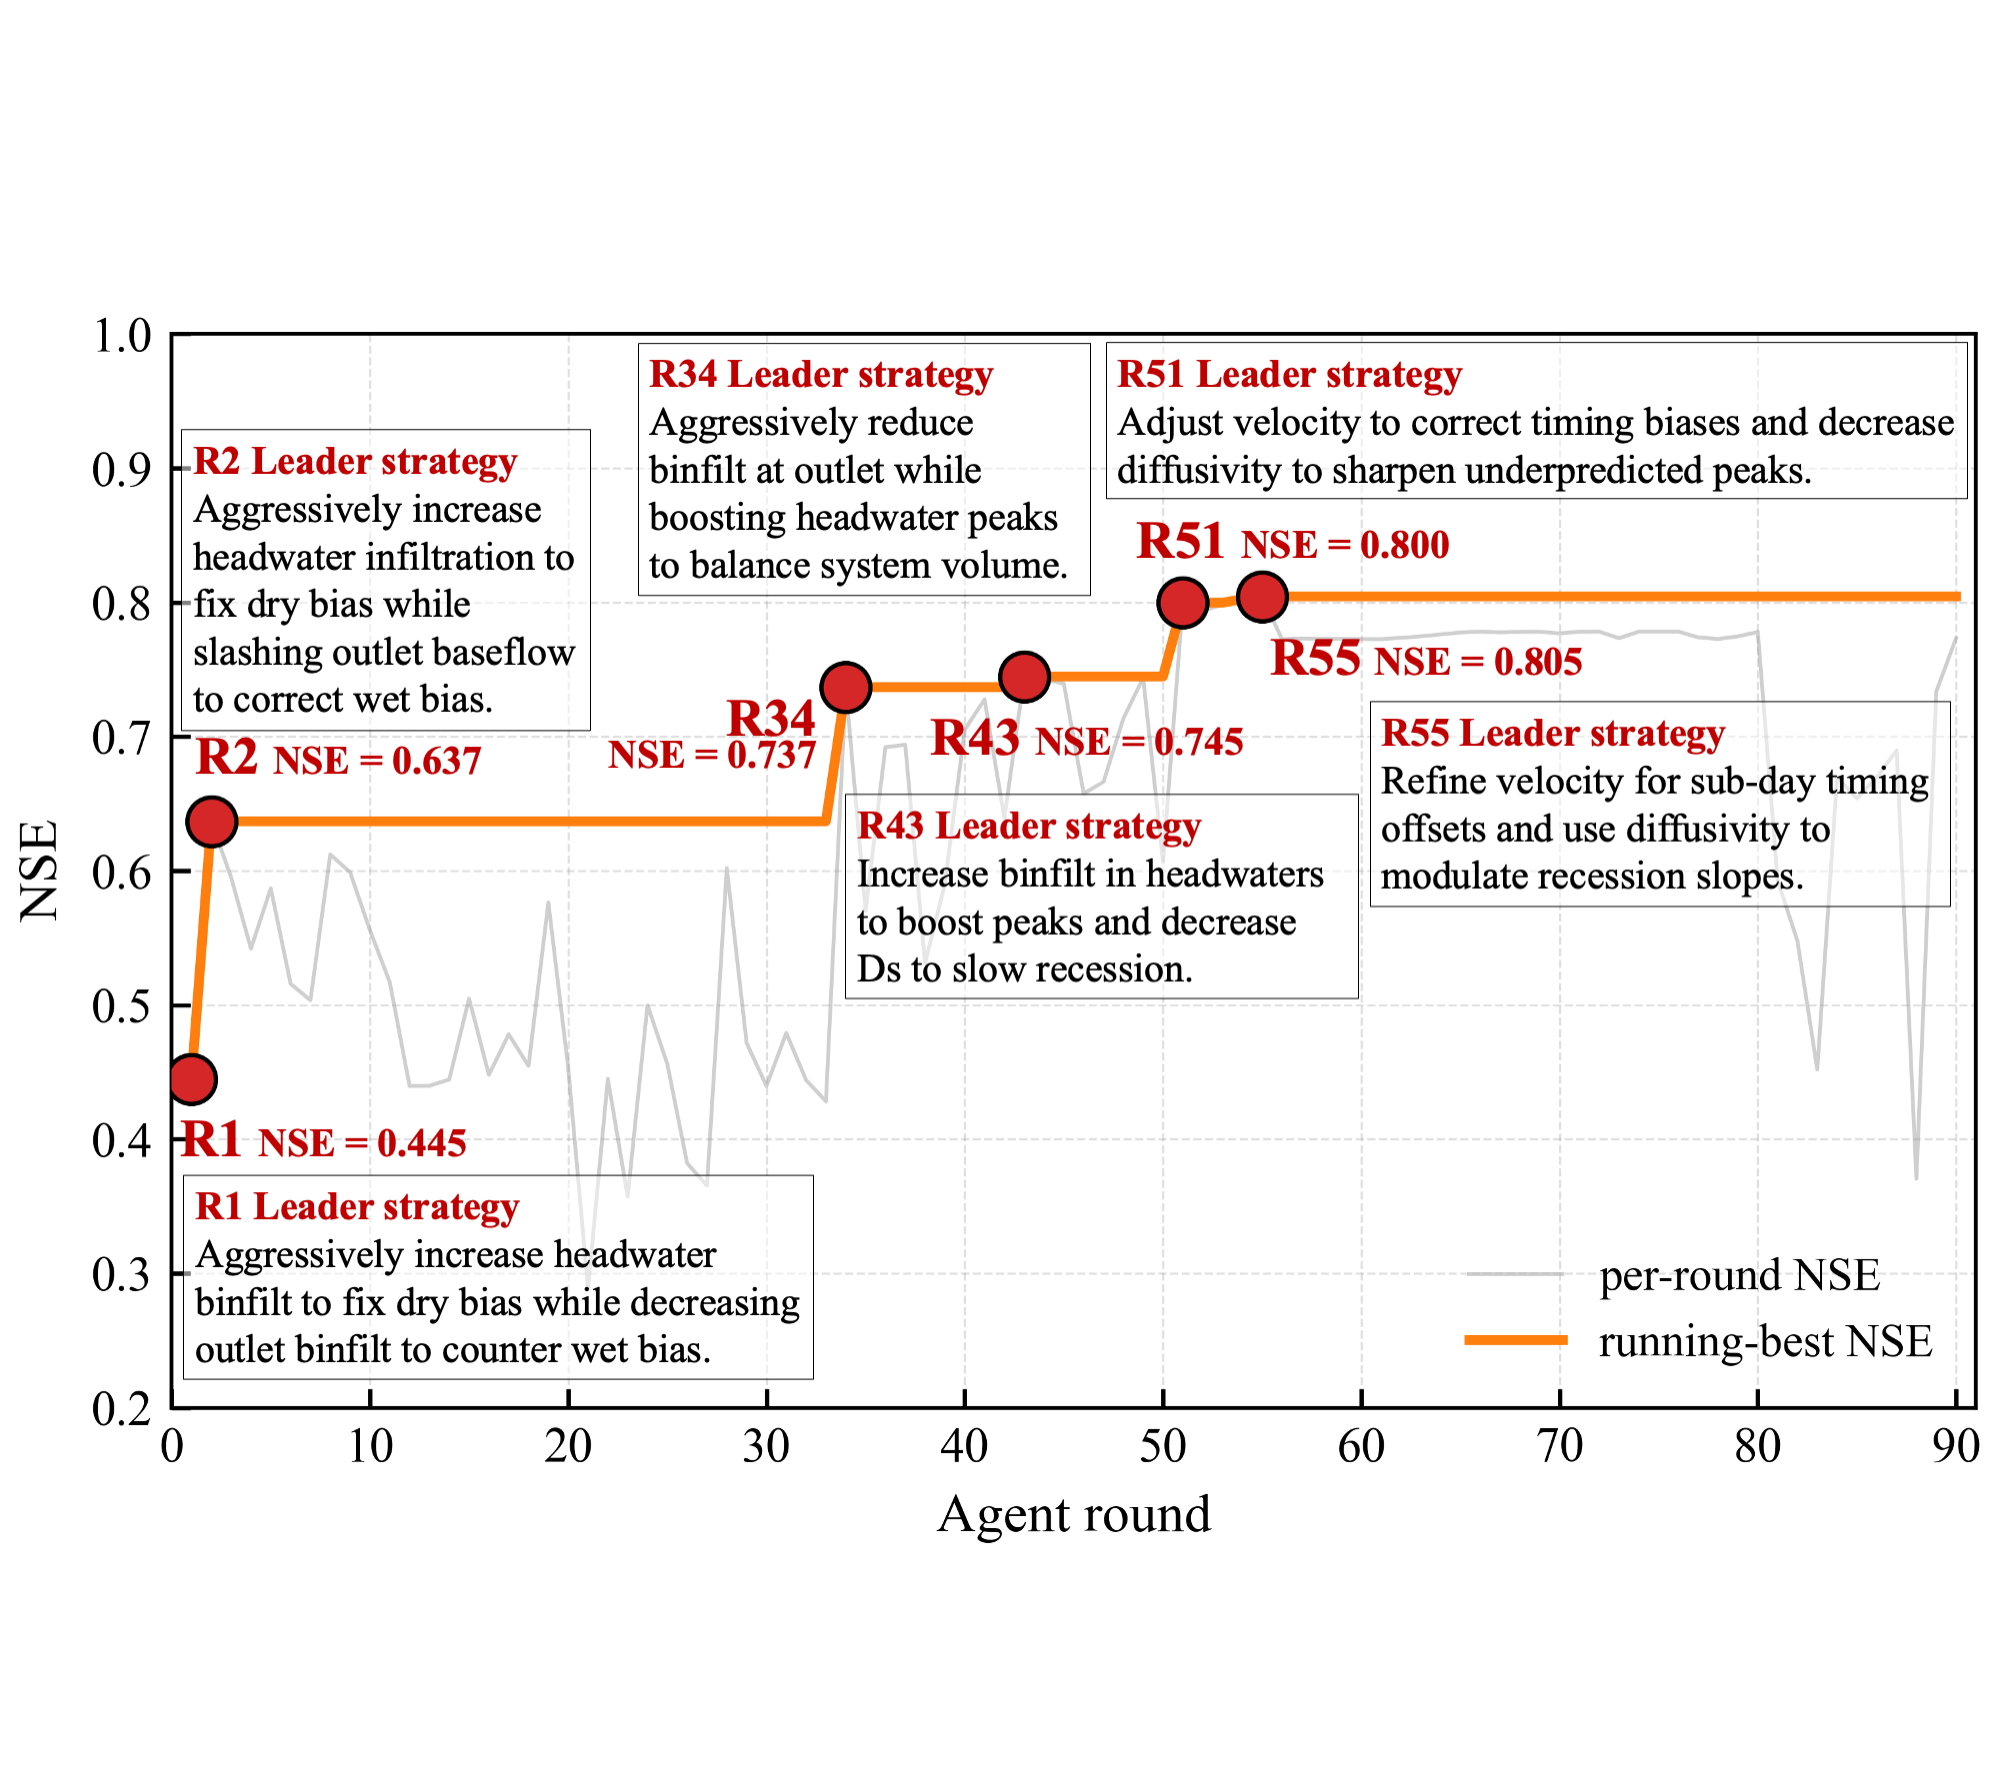


**Figure** B**1. Evolution of the Leader's diagnostic strategy across calibration rounds for a representative MADR (Gemini) run, with the NSE evaluated at the outlet station BB whose response integrates parameter adjustments across all five upstream sub-basins.**

**Appendix C**

**
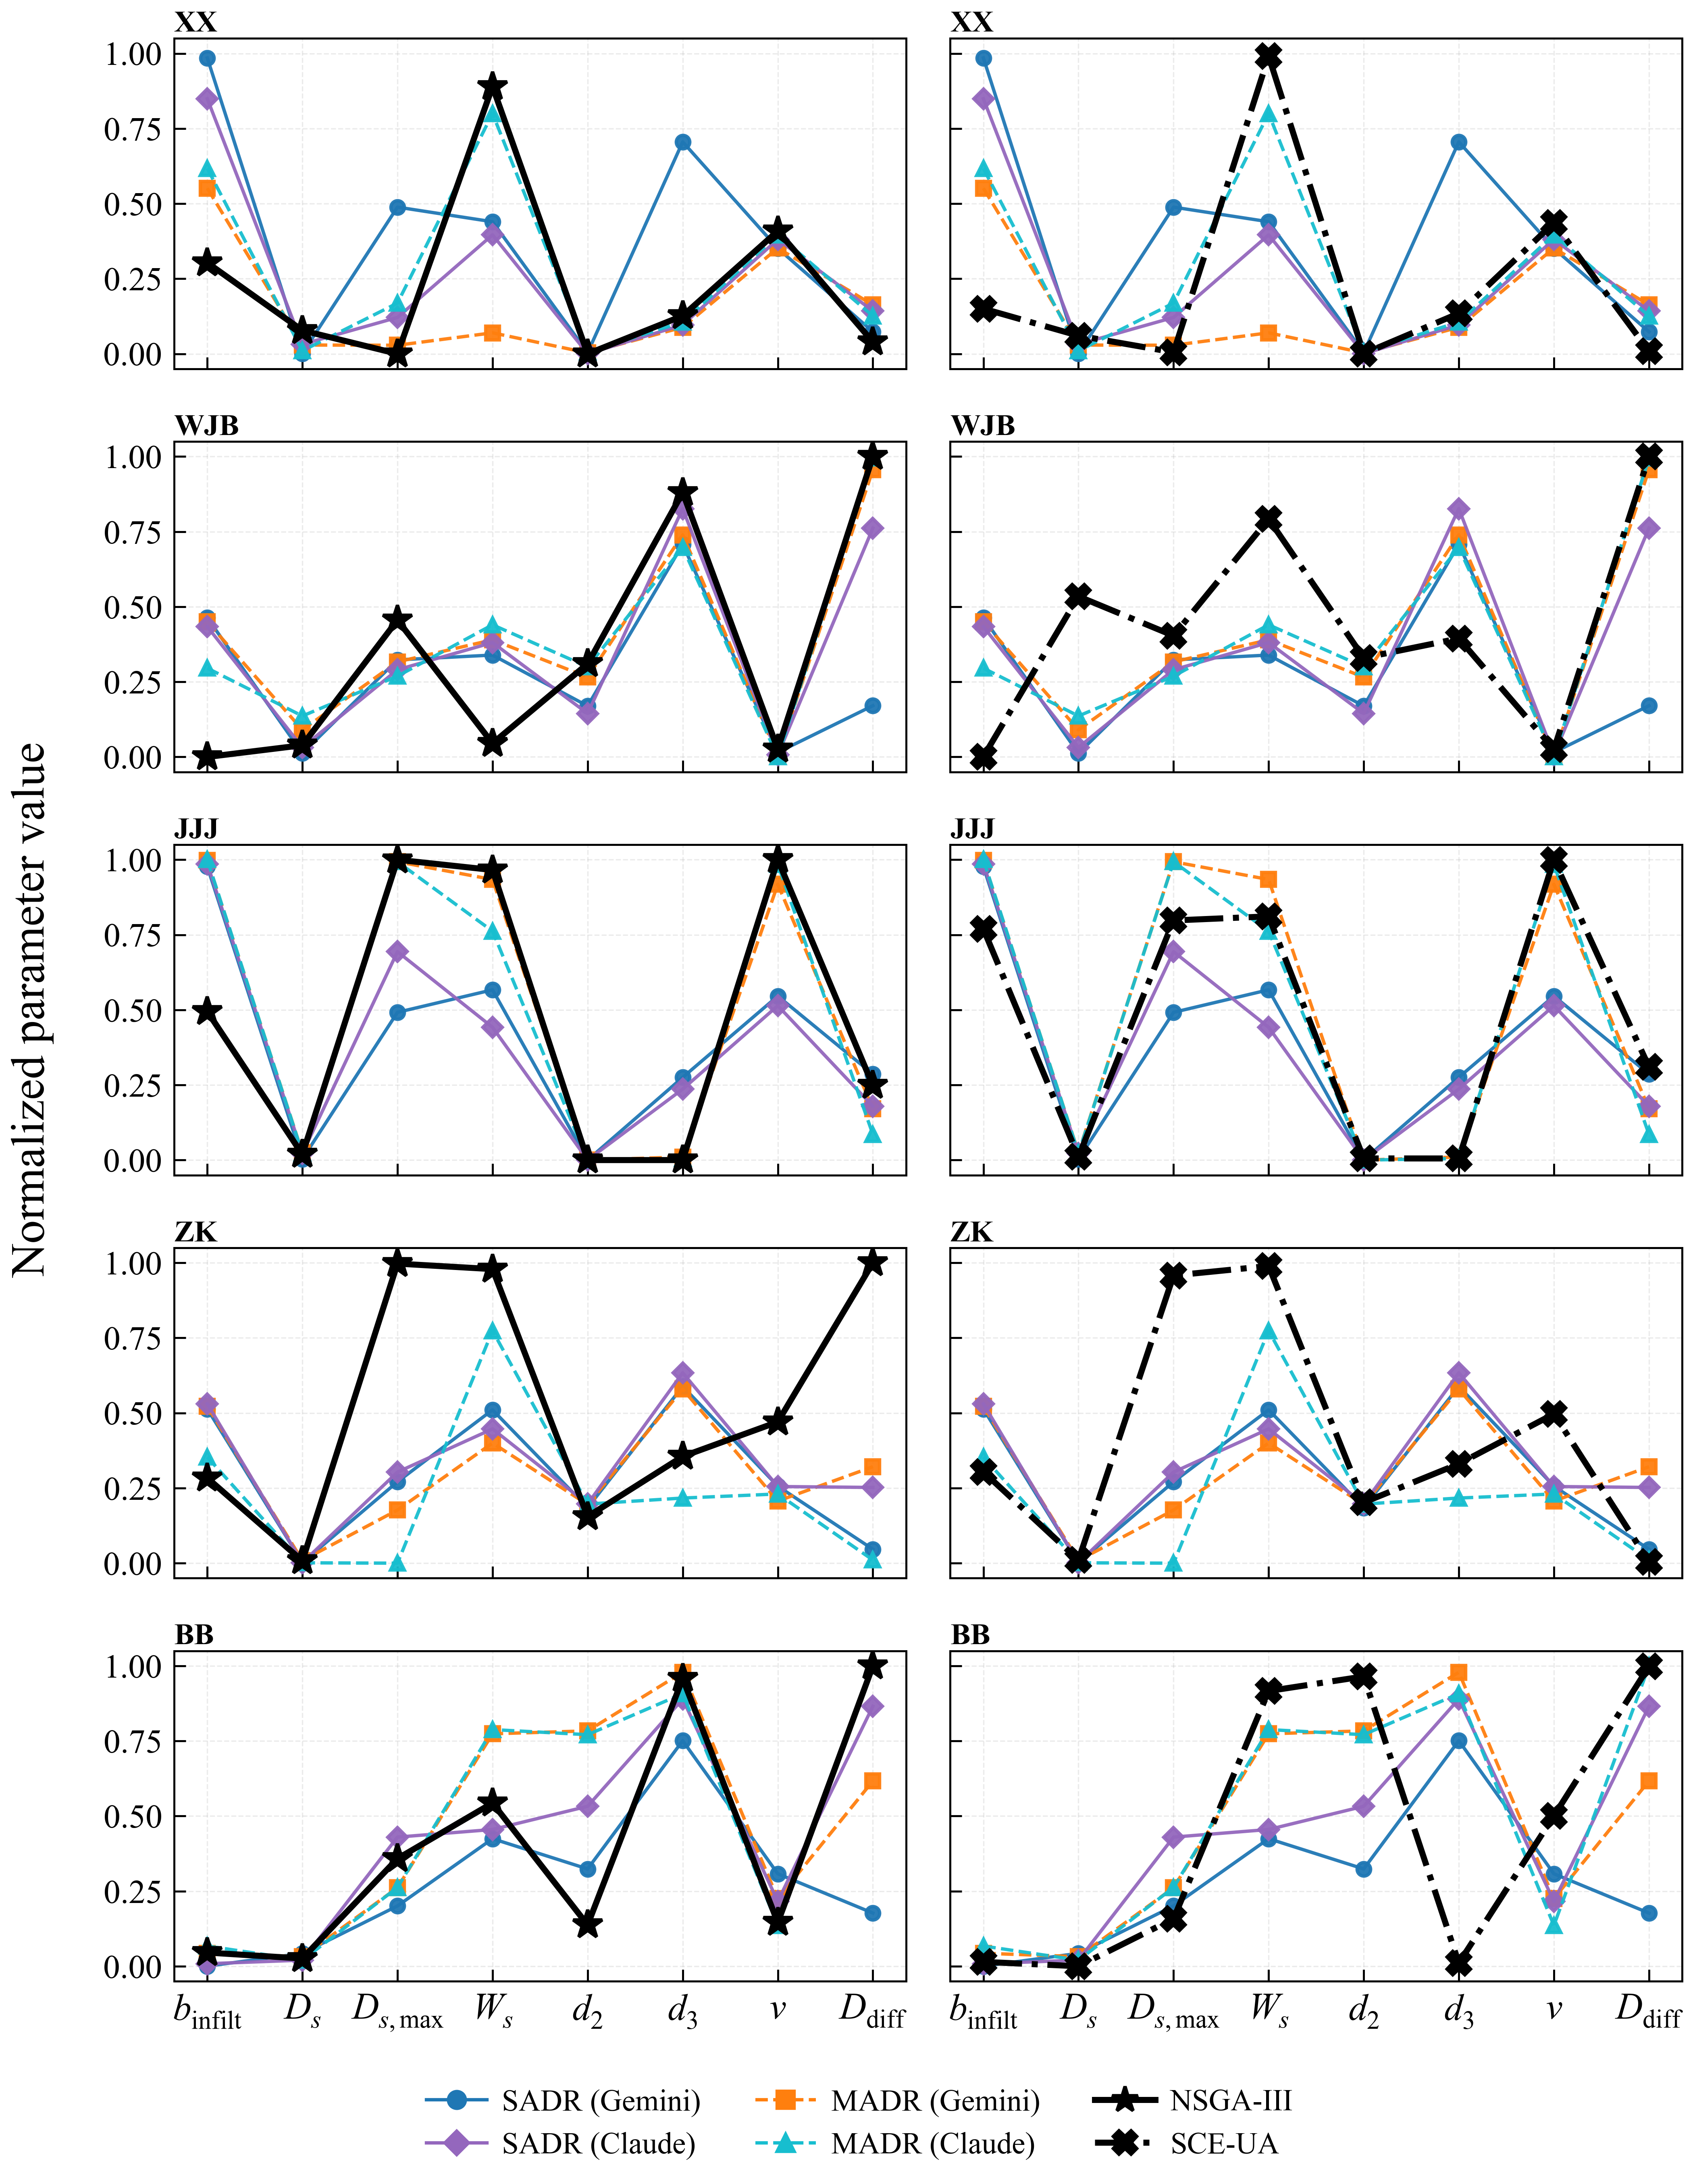
**

**Figure C1. Calibrated parameter regions for MADR and SADR versus NSGA-III (left) and SCE-UA (right) across the five sub-basins.**
